# Supplementary material for: Cytoreductive Surgery with the PlasmaJet Improved Quality-of-Life for Advanced Stage Ovarian Cancer Patients
Source: MDPI journal article supplement (doi:10.3390/cancers15153947), 2023-08-03
Supplement: s1 [file s1]

## Supplementary

Table S1. Surgical outcome

|                                           | PLASMAJET<br>N=157 (%) | CONTROL<br>N=169 (%) | P-VALUE |
|-------------------------------------------|------------------------|----------------------|---------|
| <b>Surgical outcome</b>                   |                        |                      |         |
| <b>Complete</b>                           | 119 (75.8)             | 114 (67.5)           | 0.001   |
| <b>Optimal</b>                            | 12 (7.6)               | 38 (22.5)            |         |
| <b>Suboptimal</b>                         | 8 (5.1)                | 8 (4.7)              |         |
| <b>Unresectable</b>                       | 18 (11.5)              | 9 (5.3)              |         |
| <b>Complete cytoreductive surgery YES</b> | 119 (75.8)             | 114 (67.5)           | 0.131   |
| <b>Start of surgery</b>                   |                        |                      |         |
| <b>Primary CRS</b>                        | 20 (12.7)              | 24 (14.7)            | 0.722   |
| <b>Interval CRS</b>                       | 137 (87.3)             | 145 (85.3)           |         |
| <b>Operative time (minutes)</b>           |                        |                      |         |
| <b>mean [SD]</b>                          | 236 [126]              | 222 [110]            | 0.326   |
| <b>median [min, max]</b>                  | 210 [29, 671]          | 194 [48, 595]        |         |
| <b>Missing</b>                            | 6 (3.8)                | 4 (2.4)              |         |
| <b>Abdominal drain</b>                    | 35 (22.3)              | 50 (29.4)            | 0.259   |
| <b>Blood loss (ml)</b>                    |                        |                      |         |
| <b>mean [SD]</b>                          | 923 [801]              | 956 [801]            | 0.712   |
| <b>median [min, max]</b>                  | 700 [0, 4300]          | 845 [0, 6000]        |         |
| <b>Missing</b>                            | 4 (2.5)                | 1 (0.6)              |         |
| <b>Transfusion during surgery</b>         | 41 (26.1)              | 45 (26.5)            | 0.877   |
| <b>Colostomy</b>                          | 11 (7.0)               | 21 (12.4)            | 0.100   |
| <b>Intensive Care postoperative</b>       | 34 (21.7)              | 40 (23.5)            | 0.785   |
| <b>Intensive Care (days)</b>              |                        |                      |         |
| <b>mean [SD]</b>                          | 1.9 (1.9)              | 1.6 (0.9)            | 0.339   |
| <b>median [min, max]</b>                  | 1.0 [1, 11]            | 1.0 [1, 5]           |         |
| <b>Hospitalization (days)</b>             |                        |                      |         |

|                              |             |             |       |
|------------------------------|-------------|-------------|-------|
| mean [SD]                    | 8.7 [6.5]   | 7.9 [6.4]   | 0.221 |
| median [min, max]            | 6.5 [2, 35] | 6.0 [2, 51] |       |
| missing                      | 3 (1.9)     | 0           |       |
| <b>Discharge</b>             |             |             |       |
| Home without nursing care    | 100 (63.7)  | 110 (64.7)  | 0.955 |
| Home with nursing care       | 34 (21.7)   | 39 (22.9)   |       |
| Nursing home                 | 4 (2.5)     | 3 (1.8)     |       |
| Rehabilitation center        | 2 (1.3)     | 2 (1.2)     |       |
| Hotel providing nursing care | 9 (5.7)     | 12 (7.1)    |       |
| Hospice                      | 1 (0.6)     | 0           |       |
| Death                        | 0           | 0           |       |

CRS = Cytoreductive surgery

**Table S2** Surgical complications within 30-days

|                                        | <b>PLASMAJET<br/>n=139 (%)</b> | <b>Control<br/>n=158 (%)</b> | <b>P-value</b> |
|----------------------------------------|--------------------------------|------------------------------|----------------|
| <b>Bowel laceration post-operative</b> | 2 (1.4)                        | 1 (0.6)                      | 0.597          |
| <b>Bowel obstruction (ileus)</b>       |                                |                              |                |
| -Conservative                          | 11 (7.9)                       | 14 (8.9)                     | 1              |
| -Surgery                               | 0                              | 0                            |                |
| <b>Surgical site infection</b>         |                                |                              |                |
| Sepsis                                 | 0                              | 4 (2.5)                      | 0.127          |
| Intra-abdominal abscess                | 1 (0.7)                        | 3 (1.9)                      | 0.627          |
| Urinary tract infection                | 8 (5.8)                        | 7 (4.4)                      | 0.735          |
| Superficial wound infection            | 8 (5.7)                        | 4 (2.5)                      | 0.201          |
| <b>Relaparotomy**</b>                  | 8 (5.8)                        | 3 (1.9)                      | 0.143          |
| <b>Medical complication</b>            |                                |                              |                |
| Cardiac                                | 6 (4.3)                        | 7 (4.4)                      | 1              |
| Venous thrombo-embolism                | 1 (0.7)                        | 2 (1.3)                      | 1              |
| Deep venous embolism                   | 1 (0.7)                        | 2 (1.3)                      | 1              |
| Pulmonary embolism                     | 2 (1.4)                        | 3 (1.9)                      | 1              |
| Pulmonary failure                      | 0                              | 0                            | 1              |
| Pneumonia                              | 2 (1.4)                        | 10 (6.3)                     | 0.072          |
| Respiratory insufficiency              | 7 (5.0)                        | 5 (3.1)                      | 0.551          |
| Renal failure                          | 1 (0.7)                        | 1 (0.6)                      | 1              |
| Ureter laceration                      | 0                              | 0                            | 1              |
| Gastric perforation                    | 1 (0.7)                        | 0                            | 1              |
| Anastomotic leakage                    | 1 (0.7)                        | 1 (0.6)                      | 1              |
| Stroke                                 | 1 (0.7)                        | 0                            | 1              |

|                               |         |         |       |
|-------------------------------|---------|---------|-------|
| <b>Delirium</b>               | 5 (3.6) | 1 (0.6) | 0.099 |
| <b>Death (within 30-days)</b> | 0       | 1 (0.6) | 0.319 |

\*All patients with unresectable disease are excluded from analysis and patient who underwent surgery in the Control group with the use of the PlasmaJet.

\*\* Indications intervention group: anastomotic leakage (1), suspicion of anastomotic leakage (2), to continue and finish the interval debulking surgery (1), gastric perforation (1), pancreatic leakage (1), intra-abdominal bleeding (1), pelvic abscess (1).

Control group: anastomotic leakage (1) and suspicion of anastomotic leakage (2).

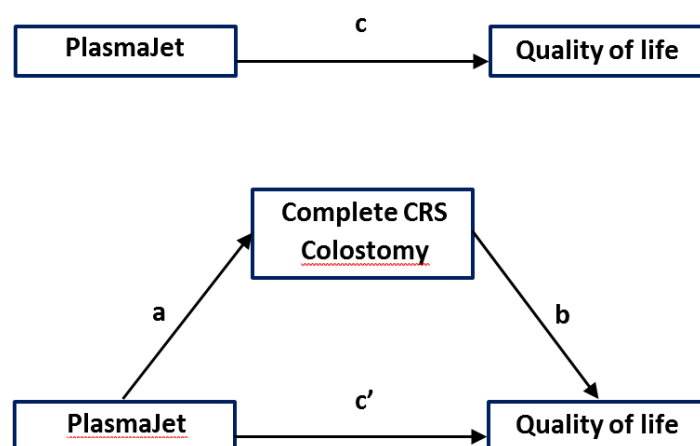

**Figure S1** Mediation analysis

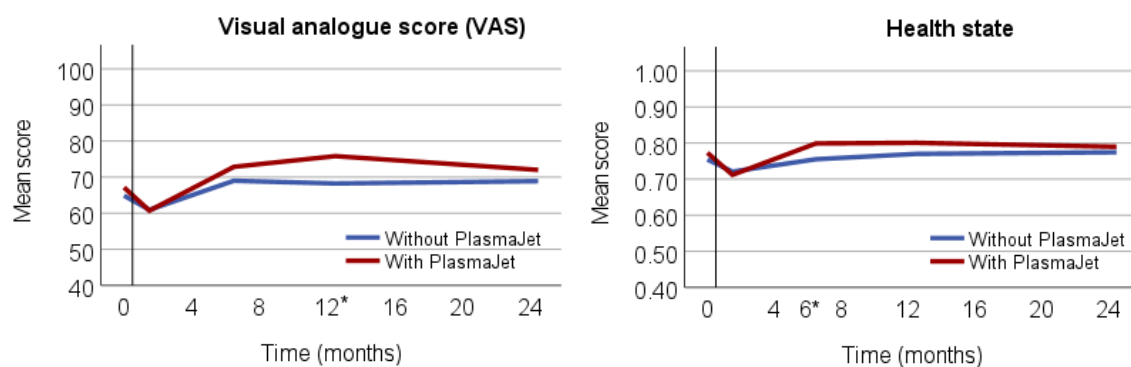

**Figure S2** Outcome EQ-5D-5L for patients who had surgery with or without the PlasmaJet. \* P < 0.05.

**Table S3** Mean scores of the EORTC QLQ-C30, QLQ-OV28 and EQ-5D-5L for every domain at five different time-points (preoperative and 1, 6, 12 and 24 months postoperative) for patients who had surgery with or without the PlasmaJet

|                              | Mean score |         | Total effect (95%CI)  | P-value | Direct effect (95%CI) | P-value |
|------------------------------|------------|---------|-----------------------|---------|-----------------------|---------|
|                              | PlasmaJet  | Control |                       |         |                       |         |
| <b>EORTC QLQ-C30</b>         |            |         |                       |         |                       |         |
| <b>Global health</b>         |            |         |                       |         |                       |         |
| Pre-op                       | 67.34      | 63.63   |                       |         |                       |         |
| 4 weeks                      | 60.80      | 60.59   | -0.638 (-4.819;3.543) | 0.765   | -1.234 (-5.395;2.927) | 0.561   |
| 6 months                     | 75.14      | 70.30   | 3.310 (-1.159;7.780)  | 0.146   | 2.591 (-1.839;7.020)  | 0.251   |
| 12 months                    | 77.92      | 70.97   | 5.305 (0.595;10.014)  | 0.027*  | 4.374 (-0.256;9.004)  | 0.064   |
| 24 months                    | 75.10      | 67.99   | 4.828 (-0.627;10.282) | 0.083   | 3.876 (-1.533;9.285)  | 0.160   |
| <b>Physical functioning</b>  |            |         |                       |         |                       |         |
| Pre-op                       | 76.16      | 72.12   |                       |         |                       |         |
| 4 weeks                      | 65.63      | 65.05   | -0.692 (-4.867;3.483) | 0.745   | -1.098 (-5.245;3.049) | 0.604   |
| 6 months                     | 80.99      | 74.98   | 3.689 (-0.185;7.564)  | 0.062   | 3.237 (-0.630;7.104)  | 0.101   |
| 12 months                    | 83.80      | 76.67   | 4.652 (0.123;9.181)   | 0.044*  | 4.115 (-0.338;8.568)  | 0.070   |
| 24 months                    | 80.24      | 74.70   | 3.344 (-2.098;8.786)  | 0.228   | 2.786 (-2.635;8.207)  | 0.314   |
| <b>Role functioning</b>      |            |         |                       |         |                       |         |
| Pre-op                       | 66.30      | 60.47   |                       |         |                       |         |
| 4 weeks                      | 48.02      | 47.30   | 0.173 (-6.049;6.395)  | 0.956   | -0.574 (-6.800;5.651) | 0.857   |
| 6 months                     | 77.27      | 66.90   | 7.757 (1.581;13.932)  | 0.014*  | 6.880 (0.671;13.089)  | 0.030*  |
| 12 months                    | 77.50      | 70.24   | 5.362 (-1.133;11.857) | 0.106   | 4.268 (-2.220;10.756) | 0.197   |
| 24 months                    | 77.78      | 70.27   | 5.800 (-1.523;13.123) | 0.120   | 4.668 (-2.710;12.046) | 0.215   |
| <b>Emotional functioning</b> |            |         |                       |         |                       |         |
| Pre-op                       | 73.78      | 71.85   |                       |         |                       |         |
| 4 weeks                      | 76.11      | 77.48   | -1.039 (-4.805;2.728) | 0.589   | -1.324 (-5.045;2.397) | 0.485   |
| 6 months                     | 79.75      | 77.47   | 1.133 (-3.201;5.466)  | 0.608   | 0.771 (-3.505;5.047)  | 0.724   |
| 12 months                    | 80.33      | 77.18   | 2.378 (-2.401;7.156)  | 0.329   | 1.902 (-2.853;6.658)  | 0.433   |
| 24 months                    | 82.14      | 76.61   | 2.256 (-2.192;8.703)  | 0.241   | 2.767 (-2.649;8.184)  | 0.316   |
| <b>Cognitive functioning</b> |            |         |                       |         |                       |         |
| Pre-op                       | 85.52      | 82.55   |                       |         |                       |         |
| 4 weeks                      | 78.39      | 81.98   | -3.579 (-7.754;0.597) | 0.093   | -3.561 (-7.744;0.623) | 0.095   |
| 6 months                     | 82.37      | 78.76   | 2.356 (-2.144;6.857)  | 0.305   | 2.393 (-2.105;6.891)  | 0.297   |
| 12 months                    | 83.50      | 80.82   | 1.631 (-2.927;6.189)  | 0.483   | 1.695 (-2.844;6.234)  | 0.464   |
| 24 months                    | 84.13      | 77.65   | 4.020 (-1.676;9.716)  | 0.166   | 4.085 (-1.630;9.801)  | 0.161   |
| <b>Social functioning</b>    |            |         |                       |         |                       |         |
| Pre-op                       | 76.52      | 74.55   |                       |         |                       |         |
| 4 weeks                      | 64.81      | 63.40   | 1.678 (-3.697;7.051)  | 0.541   | 1.087 (-4.302;6.476)  | 0.692   |

|                            |       |       |                         |        |                         |        |
|----------------------------|-------|-------|-------------------------|--------|-------------------------|--------|
| 6 months                   | 80.85 | 76.64 | 3.312 (-2.778;9.402)    | 0.286  | 2.604 (-3.459;8.667)    | 0.400  |
| 12 months                  | 84.33 | 79.36 | 4.025 (-1.694;9.745)    | 0.168  | 3.123 (-2.423;8.669)    | 0.270  |
| 24 months                  | 84.33 | 75.95 | 7.662 (0.488;14.836)    | 0.036* | 6.782 (-0.444;13.901)   | 0.066  |
| <b>Fatigue</b>             |       |       |                         |        |                         |        |
| Pre-op                     | 34.71 | 39.94 |                         |        |                         |        |
| 4 weeks                    | 47.49 | 49.32 | -0.675 (-5.878;4.527)   | 0.799  | -0.243 (-5.458;4.971)   | 0.927  |
| 6 months                   | 25.99 | 35.45 | -6.458 (-11.588;-1.329) | 0.014* | -5.888 (-11.046;-0.729) | 0.025* |
| 12 months                  | 24.78 | 35.54 | -8.047 (-13.207;-2.886) | 0.002* | -7.265 (-12.409;-2.120) | 0.006* |
| 24 month                   | 27.25 | 36.99 | -6.042 (-12.972;0.888)  | 0.087  | -5.234 (-12.206;1.738)  | 0.141  |
| <b>Nausea and vomiting</b> |       |       |                         |        |                         |        |
| Pre-op                     | 9.37  | 7.32  |                         |        |                         |        |
| 4 weeks                    | 15.06 | 13.29 | 1.027 (-4.425;6.480)    | 0.712  | 1.534 (-3.869;6.983)    | 0.578  |
| 6 months                   | 7.30  | 4.34  | 2.918 (-0.867;6.702)    | 0.131  | 3.536 (-0.268;7.340)    | 0.068  |
| 12 months                  | 4.83  | 7.01  | -1.823 (-5.613;1.967)   | 0.346  | -1.039 (-4.786;2.709)   | 0.587  |
| 24 months                  | 6.94  | 9.09  | -1.687 (-7.277;3.902)   | 0.554  | -0.876 (-6.489;4.738)   | 0.760  |
| <b>Pain</b>                |       |       |                         |        |                         |        |
| Pre-op                     | 21.41 | 21.85 |                         |        |                         |        |
| 4 weeks                    | 30.62 | 29.05 | 0.425 (-5.119;5.968)    | 0.881  | 1.031 (-4.515;6.578)    | 0.715  |
| 6 months                   | 14.46 | 17.25 | -2.885 (-8.260;2.490)   | 0.293  | -2.142 (-7.523;3.240)   | 0.435  |
| 12 months                  | 15.33 | 19.97 | -5.028 (-11.252;1.195)  | 0.113  | -4.060 (-10.120;2.000)  | 0.189  |
| 24 months                  | 13.10 | 21.40 | -6.846 (-12.932;-0.760) | 0.027* | -5.847 (-11.874;0.181)  | 0.057  |
| <b>Dyspnoea</b>            |       |       |                         |        |                         |        |
| Pre-op                     | 17.03 | 20.04 |                         |        |                         |        |
| 4 weeks                    | 20.25 | 20.95 | 0.468 (-5.084;6.020)    | 0.869  | 0.480 (-5.135;6.095)    | 0.867  |
| 6 months                   | 15.43 | 19.72 | -3.052 (-8.756;2.652)   | 0.294  | -3.042 (-8.831;2.747)   | 0.303  |
| 12 months                  | 18.00 | 20.90 | -2.553 (-8.686;3.581)   | 0.415  | -2.546 (-8.790;3.697)   | 0.424  |
| 24 months                  | 18.65 | 22.73 | -2.282 (-9.172;4.608)   | 0.516  | -2.275 (-9.175;4.624)   | 0.518  |
| <b>Insomnia</b>            |       |       |                         |        |                         |        |
| Pre-op                     | 28.71 | 26.58 |                         |        |                         |        |
| 4 weeks                    | 31.85 | 30.85 | -2.001 (-7.599;3.597)   | 0.483  | -1.441 (-7.030;4.147)   | 0.613  |
| 6 months                   | 25.62 | 24.41 | -0.071 (-5.779;5.637)   | 0.981  | 0.581 (-5.161;6.323)    | 0.843  |
| 12 months                  | 27.67 | 29.63 | -4.003 (-11.817;3.810)  | 0.315  | -3.199 (-11.009;4.611)  | 0.422  |
| 24 months                  | 25.79 | 27.27 | -1.368 (-8.706;5.970)   | 0.715  | -0.541 (-7.850;6.768)   | 0.885  |
| <b>Appetite loss</b>       |       |       |                         |        |                         |        |

|                               |       |       |                         |        |                        |        |
|-------------------------------|-------|-------|-------------------------|--------|------------------------|--------|
| Pre-op                        | 19.95 | 17.12 |                         |        |                        |        |
| 4 weeks                       | 27.41 | 28.83 | -2.504 (-9.350;4.341)   | 0.473  | -1.809 (-8.660;5.041)  | 0.605  |
| 6 months                      | 9.92  | 9.62  | -0.592 (-5.948;4.763)   | 0.828  | 0.253 (-5.038;5.545)   | 0.925  |
| 12 months                     | 7.33  | 12.43 | -6.085 (-11.385;-0.785) | 0.024* | -4.994 (-10.319;0.332) | 0.066  |
| 24 months                     | 11.11 | 17.42 | -7.141 (-14.406;0.125)  | 0.054  | -6.012 (-13.322;1.299) | 0.107  |
| <b>Constipation</b>           |       |       |                         |        |                        |        |
| Pre-op                        | 17.76 | 14.86 |                         |        |                        |        |
| 4 weeks                       | 24.69 | 22.97 | 0.794 (-5.693;7.280)    | 0.810  | 0.542 (-5.886;6.970)   | 0.869  |
| 6 months                      | 9.37  | 11.03 | -1.727 (-6.216;2.763)   | 0.451  | -1.893 (-6.363;2.578)  | 0.407  |
| 12 months                     | 11.67 | 14.81 | -3.923 (-9.552;1.706)   | 0.172  | -3.975 (-9.619;1.670)  | 0.167  |
| 24 months                     | 14.28 | 13.64 | 0.093 (-5.964;6.149)    | 0.976  | 0.033 (-6.003;6.069)   | 0.991  |
| <b>Diarrhoea</b>              |       |       |                         |        |                        |        |
| Pre-op                        | 8.03  | 7.66  |                         |        |                        |        |
| 4 weeks                       | 11.36 | 14.86 | -3.139 (-8.719;2.441)   | 0.270  | -2.818 (-8.337;2.701)  | 0.317  |
| 6 months                      | 6.61  | 4.69  | 1.776 (-2.127;5.679)    | 0.372  | 2.133 (-1.754;6.019)   | 0.282  |
| 12 months                     | 6.33  | 11.11 | -5.249 (-10.012;-0.487) | 0.031* | -4.829 (-9.531;-0.127) | 0.044* |
| 24 months                     | 5.95  | 10.98 | -5.249 (-10.795;0.296)  | 0.063  | -3.820 (-10.303;0.664) | 0.085  |
| <b>Financial difficulties</b> |       |       |                         |        |                        |        |
| Pre-op                        | 5.35  | 8.33  |                         |        |                        |        |
| 4 weeks                       | 6.17  | 6.08  | 1.045 (-1.898;3.989)    | 0.486  | 1.070 (-1.890;4.031)   | 0.478  |
| 6 months                      | 7.16  | 8.22  | 0.033 (-3.826;3.891)    | 0.987  | 0.084 (-3.832;4.001)   | 0.966  |
| 12 months                     | 8.20  | 8.00  | 0.729 (-4.010;5.467)    | 0.763  | 0.821 (-3.841;5.483)   | 0.730  |
| 24 months                     | 6.35  | 9.85  | -2.056 (-7.402;3.290)   | 0.451  | -1.960 (-7.248;3.329)  | 0.467  |
| <b>EORTC QLQ-OV28</b>         |       |       |                         |        |                        |        |
| <b>Abdominal</b>              |       |       |                         |        |                        |        |
| Pre-op                        | 23.88 | 23.45 |                         |        |                        |        |
| 4 weeks                       | 27.26 | 29.09 | -2.839 (-6.534;0.856)   | 0.132  | -2.576 (-6.267;1.115)  | 0.171  |
| 6 months                      | 17.42 | 18.85 | -1.774 (-5.370;1.821)   | 0.333  | -1.505 (-5.119;2.108)  | 0.414  |
| 12 months                     | 18.50 | 22.51 | -3.908 (-8.191;0.375)   | 0.074  | -3.622 (-7.926;0.681)  | 0.099  |
| 24 months                     | 21.63 | 23.92 | -1.131 (-5.742;3.480)   | 0.631  | -0.832 (-5.531;3.867)  | 0.728  |
| <b>Peripheral neuropathy</b>  |       |       |                         |        |                        |        |
| Pre-op                        | 24.33 | 27.74 |                         |        |                        |        |
| 4 weeks                       | 26.53 | 32.58 | -4.377 (-8.859;0.105)   | 0.056  | -3.896 (-8.370;0.579)  | 0.088  |
| 6 months                      | 31.57 | 39.24 | -5.951 (-11.934;0.032)  | 0.051  | -5.396 (-11.433;0.642) | 0.080  |

|                            |       |       |                         |        |                         |        |
|----------------------------|-------|-------|-------------------------|--------|-------------------------|--------|
| 12 months                  | 23.61 | 31.38 | -5.930 (-11.684;-0.176) | 0.043* | -5.250 (-11.047;0.548)  | 0.076  |
| 24 months                  | 25.38 | 30.99 | -3.032 (-9.114;3.049)   | 0.328  | -2.323 (-8.509;3.865)   | 0.462  |
| <b>Chemo side effects</b>  |       |       |                         |        |                         |        |
| Pre-op                     | 25.86 | 25.92 |                         |        |                         |        |
| 4 weeks                    | 24.59 | 25.75 | -1.428 (-4.811;1.955)   | 0.408  | -1.226 (-4.620;2.168)   | 0.479  |
| 6 months                   | 19.52 | 21.24 | -1.697 (-5.327;1.933)   | 0.359  | -1.473 (-5.124;2.178)   | 0.429  |
| 12 months                  | 14.38 | 18.32 | -3.602 (-6.900;-0.303)  | 0.032* | -3.338 (-6.663;-0.013)  | 0.049* |
| 24 months                  | 16.40 | 19.21 | -2.355 (-6.743;2.033)   | 0.292  | -2.081 (-6.527;2.365)   | 0.359  |
| <b>Hormonal</b>            |       |       |                         |        |                         |        |
| Pre-op                     | 14.84 | 17.46 |                         |        |                         |        |
| 4 weeks                    | 18.66 | 21.32 | -2.567 (-7.076;1.942)   | 0.264  | -2.580 (-7.105;1.946)   | 0.264  |
| 6 months                   | 23.29 | 19.17 | -3.184 (-8.841;2.473)   | 0.270  | -3.215 (-8.922;2.491)   | 0.269  |
| 12 months                  | 16.32 | 22.93 | -5.535 (-11.293;0.224)  | 0.060  | -5.595 (-11.374;0.185)  | 0.058  |
| 24 months                  | 18.31 | 27.59 | -4.579 (-11.820;2.661)  | 0.215  | -4.641 (-11.917;2.634)  | 0.211  |
| <b>Body image</b>          |       |       |                         |        |                         |        |
| Pre-op                     | 22.87 | 24.94 |                         |        |                         |        |
| 4 weeks                    | 25.25 | 28.34 | -4.081 (-9.260;1.098)   | 0.122  | -3.879 (-9.051;1.293)   | 0.141  |
| 6 months                   | 27.90 | 21.67 | -4.912 (-10.695;0.871)  | 0.096  | -4.709 (-10.525;1.108)  | 0.112  |
| 12 months                  | 16.67 | 26.40 | -8.613 (-14.248;-2.978) | 0.003* | -8.401 (-14.082;-2.721) | 0.004* |
| 24 months                  | 19.14 | 39.81 | -7.270 (-13.808;-0.733) | 0.029* | -7.052 (-13.633;-0.470) | 0.036* |
| <b>Attitude to disease</b> |       |       |                         |        |                         |        |
| Pre-op                     | 51.91 | 56.01 |                         |        |                         |        |
| 4 weeks                    | 59.37 | 58.58 | 1.129 (-3.223;5.480)    | 0.611  | 1.835 (-2.450;6.121)    | 0.401  |
| 6 months                   | 51.76 | 56.26 | -1.146 (-6.749;4.456)   | 0.688  | -0.376 (-5.937;5.184)   | 0.894  |
| 12 months                  | 47.22 | 50.76 | -1.424 (-7.482;4.634)   | 0.645  | -0.529 (-6.530;5.472)   | 0.863  |
| 24 months                  | 44.03 | 54.32 | -5.653 (-12.214;0.908)  | 0.091  | -4.731 (-11.303;1.841)  | 0.158  |
| <b>Sexuality</b>           |       |       |                         |        |                         |        |
| Pre-op                     | 94.40 | 92.74 |                         |        |                         |        |
| 4 weeks                    | 95.40 | 95.75 | -1.175 (-3.791;1.441)   | 0.379  | -1.044 (-3.691;1.603)   | 0.439  |
| 6 months                   | 87.03 | 88.06 | -2.069 (-5.735;1.596)   | 0.268  | -1.910 (-5.592;1.773)   | 0.309  |
| 12 months                  | 87.41 | 87.13 | -0.681 (-5.038;3.675)   | 0.759  | -0.474 (-4.803;3.856)   | 0.830  |
| 24 months                  | 88.58 | 87.22 | -0.804 (-5.158;3.551)   | 0.717  | -0.590 (-4.941;3.762)   | 0.791  |
| <b>EQ-5D-5L</b>            |       |       |                         |        |                         |        |
| <b>Health status</b>       |       |       |                         |        |                         |        |

|            |       |       |                       |        |                       |        |
|------------|-------|-------|-----------------------|--------|-----------------------|--------|
| Pre-op     | 0.77  | 0.75  |                       |        |                       |        |
| 4 weeks    | 0.71  | 0.72  | -0.004 (-0.046;0.038) | 0.842  | -0.011 (-0.052;0.030) | 0.605  |
| 6 months   | 0.80  | 0.76  | 0.041 (0.009;0.081)   | 0.045* | 0.034 (-0.007;0.074)  | 0.105  |
| 12 months  | 0.80  | 0.77  | 0.021 (-0.029;0.071)  | 0.402  | 0.012 (-0.037;0.061)  | 0.633  |
| 24 months  | 0.79  | 0.77  | 0.011 (-0.043;0.066)  | 0.678  | 0.002 (-0.052;0.056)  | 0.945  |
| <b>VAS</b> |       |       |                       |        |                       |        |
| Pre-op     |       |       |                       |        |                       |        |
| 4 weeks    | 67.16 | 64.90 | -0.754 (-4.518;3.009) | 0.694  | -1.253 (-5.009;2.502) | 0.513  |
| 6 months   | 72.88 | 69.01 | 3.175 (-0.514;6.863)  | 0.091  | 2.563 (-1.123;6.248)  | 0.173  |
| 12 months  | 75.84 | 68.26 | 6.571 (1.992;11.150)  | 0.005* | 5.774 (1.177;10.370)  | 0.014* |
| 24 months  | 72.03 | 68.91 | 2.387 (-3.006;7.781)  | 0.385  | 1.563 (-3.815;6.940)  | 0.569  |

---

Total effect: score corrected for preoperative score. Direct effect: score corrected for preoperative score and effect of the mediators ‘Surgical outcome’ and ‘Colostomy’. \* =  $p < 0.05$



**Table S4** Outcome of the EORTC QLQ-C30 of patients with complete cytoreductive surgery

|                      | Mean score              |                            | 95%CI           | p-value |
|----------------------|-------------------------|----------------------------|-----------------|---------|
|                      | Complete CRS<br>(n=233) | Non-complete CRS<br>(n=93) |                 |         |
| <b>EORTC QLQ-C30</b> |                         |                            |                 |         |
| <b>Global health</b> |                         |                            |                 |         |
| 12 months            | 77.1                    | 62.8                       | 11.8 (5.6;18.1) | 0.002*  |
| 24 months            | 72.7                    | 65.8                       | 3.7 (-4.3;11.7) | 0.368   |

CRS= cytoreductive surgery

**Table S5** Outcome of the EORTC QLQ-C30 of patients who received a colostomy

|                      | Mean score          |                         | 95%CI            | p-value |
|----------------------|---------------------|-------------------------|------------------|---------|
|                      | Colostomy<br>(n=32) | No Colostomy<br>(n=294) |                  |         |
| <b>EORTC QLQ-C30</b> |                     |                         |                  |         |
| <b>Global health</b> |                     |                         |                  |         |
| 12 months            | 71.7                | 74.3                    | -2.4 (-11.2;6.4) | 0.588   |
| 24 months            | 71.1                | 71.5                    | -2.4 (-5.6;10.4) | 0.557   |
